# Supplementary material for: Intra-Genomic Heterogeneity in 16S rRNA Genes in Strictly Anaerobic Clinical Isolates from Periodontal Abscesses
Source: PLoS One. 2015 Jun 23;10(6):e0130265. doi: 10.1371/journal.pone.0130265 (PMC4477887; doi:10.1371/journal.pone.0130265)
Supplement: S3 Table — Green, pink, blue, yellow and open-shaded rectangles indicate >50%, >60%, >70%, >80% and >90% sequence similarity, respectively. *** indicates that data are not available because there is only one strain in the genus. (XLSX) [file pone.0130265.s006.xlsx]

## Sheet: 16s rRNA
	Alloprevotella rava	Bacteroides fragilis 638R	Candidatus Prevotella conceptionensis	P. buccae	P. dentalis	P. denticola	P. fusca	P. histicola	P. intermedia	P. melaninogenica cladeA	P. melaninogenica cladeB	P. multiformis	P. nigrescens	P. oris	P. oulorum	P. pallens	P. salivae	P. veroralis
Alloprevotella rava	98.9-99.2
Bacteroides fragilis 638R	84.5-84.8	***-***
Candidatus Prevotella conceptionensis	82-82.8	81.1-81.1	99.4-99.6
P. buccae	82.1-82.8	81-81.3	89-89.8	98.9-100
P. dentalis	80.5-81.1	80.9-81	89.5-89.6	88.9-89.4	99.8-100
P. denticola	82.9-83.9	81.1-81.4	88.3-88.8	89.6-90.6	88.5-89.2	98.6-100
P. fusca	83.9-84.6	82.7-82.7	88.5-88.6	89-89.3	88.1-88.2	93.7-94.3	***-***
P. histicola	84.4-84.9	83-83	88.6-88.9	88-88.5	88.5-88.6	91.8-92.3	95.9-96.1	99.8-99.8
P. intermedia	82.8-83.8	81.4-81.8	87.1-87.7	86.1-87	87.7-88.3	88.6-89.6	90.8-91.1	90.9-91.6	99-100
P. melaninogenica cladeA	84.3-85	82.8-82.9	88.1-88.6	87.4-88.1	88.3-88.6	92.3-93	95.9-96.1	98.2-98.3	90.6-91.5	99.3-99.9
P. melaninogenica cladeB	84.5-85.2	82.8-83	87.9-88.3	87.3-87.9	87.9-88.3	92.3-93.2	95.9-96.1	97.4-97.7	90.8-91.5	98.5-99.1	99.4-99.8
P. multiformis	83-83.7	81.1-81.2	87.9-88.2	89.8-90.2	88.5-88.6	96.4-96.9	93.9-94	91.7-92	88.6-89	91.7-92.1	92.1-92.4	99.6-99.6
P. nigrescens	83.3-83.7	81.7-82	87.3-87.9	86.4-87.1	87.9-88.2	89.7-90.5	90.2-90.5	89.4-90	92.7-93.4	89.6-90.4	89.7-90.3	89.1-89.5	99.3-100
P. oris	82.7-83.6	81.5-81.5	89.5-89.9	88.4-89.1	89.3-89.8	90.5-91.2	91.5-91.6	91.1-91.5	89-89.8	90.5-90.8	90.5-91	90.2-90.9	88.9-89.5	98.9-99.5
P. oulorum	84-85	83.1-83.3	87.7-88	87.1-87.7	88.3-88.5	89.5-90.3	91.9-92.1	92.7-93	90.2-90.7	92.2-92.8	91.7-92.6	89.3-89.5	88.9-89.5	91.8-92.3	98.7-98.7
P. pallens	83-83.6	83.6-83.6	87-87.3	85.5-86.3	87.3-87.6	88.6-89	90.8-90.9	91.7-91.8	93.8-94.7	91.7-91.9	91.5-92	88.3-88.5	93-93.6	89.3-89.7	91.2-91.3	99.2-99.8
P. salivae	83.8-84.3	82-82	89.1-89.6	87.7-88.2	88.9-89	89.8-90.7	92-92.3	93-93.4	89.5-89.8	92.5-92.8	92.2-92.5	89.7-90	88.8-89.4	94.8-95.4	93.5-94.5	89.7-90.1	99.4-99.4
P. veroralis	83.8-84.5	83-83	88-88.6	88.1-88.7	88.7-88.8	91.1-91.8	95.1-95.2	98-98.3	90.5-91	97.5-98	96.5-97.2	90.8-91.2	89.3-89.8	90.8-91.3	92.2-92.7	91.6-91.8	92.8-93	98.9-98.9

## Sheet: rpoB
	Alloprevotella rava	Bacteroides fragilis 638R	Candidatus Prevotella conceptionensis	P. buccae	P. dentalis	P. denticola	P. fusca	P. histicola	P. intermedia	P. melaninogenica cladeA	P. melaninogenica cladeB	P. multiformis	P. nigrescens	P. oris	P. oulorum	P. pallens	P. salivae	P. veroralis
Alloprevotella rava	90-99.5
Bacteroides fragilis 638R	72.9-73.7	***-***
Candidatus Prevotella conceptionensis	67.9-69	70.9-71.1	97.6-97.7
P. buccae	69.9-71.2	73.1-73.4	78.4-79.3	99.1-100
P. dentalis	67.3-68.9	67.9-68.2	77.5-78	76.4-77	99.1-100
P. denticola	69.4-70.3	69.8-70.2	76.4-77.2	78.6-79.3	78.7-79.6	97.9-99.9
P. fusca	71.4-72.7	72.4-72.4	75.6-76	78.6-78.9	76.7-76.9	83.7-84	***-***
P. histicola	72.1-72.7	71.5	72.5-72.9	76-76.4	72.4-72.7	79.5-80	83-83.1	99.6
P. intermedia	71.2-73.5	71.1-71.8	75.2-76.5	76.1-76.9	73.6-74.6	77.6-78.7	80.6-81.4	78.1-79	96.2-100
P. melaninogenica cladeA	73.2-73.9	73.7-73.9	74.3-74.9	78.6-78.9	75.1-75.4	81.6-82.1	88.7-88.9	83.2-83.5	81.3-82.4	98.8-100
P. melaninogenica cladeB	71.8-73.6	72.4-72.8	74.2-75.3	77.7-78.6	75-75.9	82-83.3	88.8-89.6	82.9-83.4	80.9-82.5	92.8-94.1	97.6-99.9
P. multiformis	70.2-71.2	70.9-71	77-77.5	78.6-79.2	79.6-80.1	89.3-90.5	84.3-84.3	80.2-80.4	78.1-79.1	82.8-82.9	82.8-83.9	99.3
P. nigrescens	71.1-71.9	71-71.3	72.3-72.8	74.6-75.3	70.1-70.8	73.7-74.7	78-78.4	77.8-78.2	83.7-85.5	78.4-78.7	77.9-78.6	74.1-74.9	98.1-100
P. oris	71.5-72.6	71.3-71.5	76.1-77.1	78.1-78.8	74.7-75.2	77.6-78.6	80.6-81	78.6-79	78.1-78.9	80.3-80.7	80.4-81.9	79.3-79.8	75.7-76.5	97.7-98.8
P. oulorum	71.4-72.5	71.2-71.3	74.4-75.2	76.7-77.3	73.8-74	75.4-75.9	77.7-77.8	76.8-77	76.5-77.4	77.8-78.3	78.1-78.8	77-77.4	75-75.6	82.1-82.4	99.2
P. pallens	70.3-71.4	70.6-70.7	71.6-72.1	74.2-74.4	70.2-70.5	74.4-75	77.5	78.6	82.5-83.6	78.5-78.9	78-78.7	75-75.1	86.2-87.1	76.1-76.6	74.6-74.7	99.4-99.6
P. salivae	72-72.5	72.3-72.4	73.9-74.4	76.7-77.1	73.2-73.5	75.8-76.3	78.3-78.5	78.3-78.7	77.4-78.2	81.2-81.4	79.3-80.3	76.6-76.8	76.1-76.4	84.2-84.6	80-80.2	76.1-76.4	98.1
P. veroralis	72.1-72.9	72.5-73.1	73.6-74.8	77.9-78.6	73.5-74.4	80.3-81.8	85-85.8	83.5-83.9	79.8-81.7	86.1-87	84.8-86.9	80.6-81.8	78.5-79.3	79.4-80.6	78.3-78.6	79-79.2	79.8-80.8	93.5

## Sheet: hsp60
	Alloprevotella rava	Bacteroides fragilis 638R	Candidatus Prevotella conceptionensis	P. buccae	P. dentalis	P. denticola	P. fusca	P. histicola	P. intermedia	P. melaninogenica cladeA	P. melaninogenica cladeB	P. multiformis	P. nigrescens	P. oris	P. oulorum	P. pallens	P. salivae	P. veroralis
Alloprevotella rava	95.8-97.6
Bacteroides fragilis 638R	70.1-70.7	***-***
Candidatus Prevotella conceptionensis	69-71.2	68.9-69.6	95.8-96.9
P. buccae	72.3-73.6	73.3-73.8	77.1-78.6	99.3-100
P. dentalis	72.7-74.9	72.9-73.3	77.1-78.8	81.3-82.2	98.9-100
P. denticola	69-70.3	71.6-72.3	75.1-76.2	79.9-81.5	78.4-79.3	98.7-100
P. fusca	70.5-71.1	72.5	76.4-76.9	78.6-79.1	76.2-77.1	82.8-83.2	***-***
P. histicola	66.8-67.6	73.6-74.2	72.3-74.4	74.7-75.8	71.8-73.8	80.6-81.1	82.6-83.9	98.2
P. intermedia	69.2-72.3	71.8-73.1	75.8-78.8	79.1-80.6	76.2-77.8	76.2-78	79.3-80.8	78.4-79.7	97.1-100
P. melaninogenica cladeA	68.5-69.6	73.8-74	73.8-74.4	75.8-76.6	74.9-75.6	81.1-81.7	87.9-88.1	85.3-86.3	79.5-81	99.8-100
P. melaninogenica cladeB	70-72.5	75.6-76	74.7-76.6	77.5-78.9	75.3-78.2	82.6-84.6	86.8-88.5	85.7-88.3	80.6-83.7	89-90.7	94.3-99.1
P. multiformis	69.6-71.1	71.4-72	75.3-76.4	80.8-81.9	81.3-81.9	90.5-91.6	82.1-82.2	79.3-79.9	77.3-78.8	80.8-81.1	81.7-82.8	98.9
P. nigrescens	68.9-70.9	71.8-72.7	75.3-77.1	80.4-81.5	75.3-76.4	75.1-76.6	77.3-78.4	77.1-78.4	89.7-92.3	78.4-80	78.9-81	76.7-77.5	98.2-100
P. oris	66.3-68.1	73.4-74.4	75.6-77.7	78.8-79.5	73.6-74.9	77.3-77.8	80.2-80.8	77.1-78.4	79.7-81.9	79.3-80	78.9-80.6	76.6-77.1	79.1-79.9	97.8-99.3
P. oulorum	67.2-68.5	71.6	75.6-76.9	75.3-76.4	72.7-74	74.2-74.9	76.2-76.6	75.6-76.7	76-77.3	76.7-76.9	75.3-76.9	73.3-73.6	72.7-74	80.6-81.5	98.4
P. pallens	65.9-66.7	72	74.5-75.1	74.9-75.1	68.7-69.6	74.7-75.5	77.7	78-78.6	83.7-84.8	80-80.2	78.2-80	73.3-73.4	82.8-84.2	79.1-79.5	77.8-78.6	99.6
P. salivae	66.3-67.8	73.4-73.6	74-75.8	77.5-78.4	72.5-73.1	75.8-76.4	77.1-77.3	77.7-78	77.7-78.9	77.3-78	77.7-79.7	74-74.7	77.1-78.2	85.5-86.3	79.5-80.2	77.1-77.7	99.5
P. veroralis	69.4-70.3	72.9-73.1	75.1-75.8	75.3-75.8	75.5-76	80.4-80.8	84.4-84.6	84.8-85.5	78.8-80.2	85.5-86.3	84.4-85.5	79.3-80.4	77.5-78.6	78.2-79.1	78.2-78.4	78.8-78.8	78.8-79.3	97.8

## Sheet: gyrB1
	Alloprevotella rava	Bacteroides fragilis 638R	Candidatus Prevotella conceptionensis	P. buccae	P. dentalis	P. denticola	P. fusca	P. histicola	P. intermedia	P. melaninogenica cladeA	P. melaninogenica cladeB	P. multiformis	P. nigrescens	P. oris	P. oulorum	P. pallens	P. salivae	P. veroralis
Alloprevotella rava	92.5-98
Bacteroides fragilis 638R	65.9-66.4	***-***
Candidatus Prevotella conceptionensis	67.9-69.4	65-65.6	96.5-96.7
P. buccae	71.6-72.5	65-65.4	77.9-78.8	98.7-100
P. dentalis	70.3-71.2	64.5-65.1	78.2-78.8	84.1-84.9	99-100
P. denticola	69.4-70.2	65.4-65.7	76.6-77.1	78.8-79.6	79.1-79.9	98.6-100
P. fusca	68.9-69.6	64.1-64.1	76.2-76.6	76.1-76.6	75.4-75.9	84.6-84.9	***-***
P. histicola	66.8-68.3	64.1-64.2	72.8-73.4	72.4-73.6	72.6-73.4	79.2-79.9	81.5-81.8	98.6-98.6
P. intermedia	69.2-71.2	64.3-65.4	76.3-77.8	75-76.5	74.5-76.3	75.6-77.3	77.1-78.2	76.2-77.8	95.8-100
P. melaninogenica cladeA	68.4-69.3	64.6-64.7	72.8-73.5	73.4-74.8	73-73.9	81.6-82.4	88.2-89	81.3-81.8	76.2-79	94.9-100
P. melaninogenica cladeB	68.6-70.2	64-64.8	74.3-75.4	74.3-75.5	73.1-74.3	81.6-82.9	89-90.3	80.6-81.8	75.3-78	92.3-94.5	95.3-98.5
P. multiformis	69-70.1	65.5-65.6	77.1-77.3	79.2-79.8	80-80.3	86.8-87.6	84.8-85.1	79-79.6	76-76.9	81.2-81.6	81.7-82.7	99.3-99.3
P. nigrescens	67.6-68.7	65-65.3	74.5-75.4	73-74	72.5-73.4	74.7-75.6	75-75.3	75.9-76.5	82.1-83.2	74.9-76.4	74.8-76	74.7-75	99.4-100
P. oris	69.4-71.1	65.2-65.5	75.9-76.4	76.9-77.3	75.5-76.1	76-77.1	76-76.1	76.5-76.6	75.9-77.4	74.9-75.2	75-76.1	76.4-77.1	75.4-76.4	98.8-99
P. oulorum	67.6-69.1	62.9-63.1	74.5-75.3	76.1-76.9	73.1-74.4	73.5-74	74.5-74.9	74.7-74.7	75.6-76.8	73.8-74.5	73.6-75.2	73.2-73.4	76.3-76.9	79.9-80.1	98.5-98.5
P. pallens	66.3-67.1	64.8-65	72.9-73.7	70.5-71.2	69.6-70.4	72.4-72.7	73.2-73.3	75.9-76.2	82.3-83.2	74.2-74.3	73-74.3	71-71.3	86.4-86.9	74.1-74.3	75.6-76.5	99.2-99.5
P. salivae	68.5-69.6	64.2-64.4	74.2-75.2	75.5-76.2	74.7-75.1	74.3-75	75.5-75.8	76.4-76.6	76.1-77.2	75.1-75.2	74.8-76.2	74.5-75.1	75.6-76	86.8-87.7	78.2-78.5	74.6-75.2	98.6-98.6
P. veroralis	67.7-68.3	64.3-64.5	72.3-73.6	73.4-73.9	71.2-71.6	78.7-79.6	82.9-83.3	81.1-81.6	74.6-75.6	81.5-82.7	82.7-83.9	80-80.8	75.2-76	74.3-74.6	75.5-76.1	73.7-74.1	75.2-75.5	98.9-98.9

## Sheet: recA
	Alloprevotella rava	Bacteroides fragilis 638R	Candidatus Prevotella conceptionensis	P. buccae	P. dentalis	P. denticola	P. fusca	P. histicola	P. intermedia	P. melaninogenica cladeA	P. melaninogenica cladeB	P. multiformis	P. nigrescens	P. oris	P. oulorum	P. pallens	P. salivae	P. veroralis
Alloprevotella rava	95.2-98.2
Bacteroides fragilis 638R	72.7-73.2	***-***
Candidatus Prevotella conceptionensis	77-78.7	72.5-72.8	97.7-98
P. buccae	72.7-74	71.2-71.5	80.5-81.5	98.5-100
P. dentalis	71.5-74.8	68.3-69.2	78.2-79.2	76.3-78	98-100
P. denticola	75.2-76.8	72-72.7	73.5-74.8	74.5-75.7	74.7-76.3	97.7-100
P. fusca	75.2-75.7	71.7-71.7	73-73.8	75.3-75.8	72.7-73.3	88.2-88.7	***-***
P. histicola	73-74	74-74.5	73.3-73.7	73.5-74.5	70.2-71.7	81.5-83.3	83-83	99-99
P. intermedia	73.8-76.5	72.3-73.3	79.5-82	75-77.2	73.7-75.3	77.2-79.5	77.3-78.7	74.8-76.5	96.7-100
P. melaninogenica cladeA	74.3-75.5	72.7-72.8	72.3-73.2	74.2-75.2	71.3-72.7	87.5-88.7	90.7-91.2	81.8-82.8	76.2-77.7	98.3-100
P. melaninogenica cladeB	73-76.2	71.8-73.5	71.3-73.8	72.5-75.5	71.2-73.5	85.7-90.2	90.8-93	81.5-82.8	75.2-78.7	91-95.8	90.8-96.5
P. multiformis	74.3-75.3	70.3-71	77-77.7	80.5-81.3	77.2-78.3	88-89.2	84.5-84.5	80.7-80.7	79-80.3	82.3-82.3	80.7-83.5	97-97
P. nigrescens	74.3-76.2	72.2-72.8	79-80.5	76.8-78.7	74.8-76.3	76.2-77.3	76-76.8	73.5-74.7	93-95.3	75.5-76.5	74-77.7	78.8-79.5	98.7-100
P. oris	74-75.5	70.8-71	74.5-75.2	74.8-75.7	72-73	80.7-81.7	79.5-80	75.5-77	73.7-75.7	79.3-80.3	77.8-81.3	76.3-77.2	73.5-75	98.7-98.7
P. oulorum	68.8-70.3	68-68	74-74.7	74.3-76.2	71-74	68.8-70.8	68.3-69.5	70.5-71.2	70-71.7	69-69.3	68-70.7	71.8-73	70.8-72.2	71.8-72.8	95.5-95.5
P. pallens	71.3-73.5	70.2-70.5	75.7-76.7	73.3-74.5	70-71.5	73.5-74.7	74.2-74.7	74.3-74.5	79.7-81.2	75.2-75.7	73.2-75.8	73.2-74.5	79.2-80	73.3-74.2	67.7-68.2	99.3-99.7
P. salivae	71-72	68.5-68.5	72.2-73.3	72.5-73.2	69.5-71	74.5-75.5	75.2-75.2	72.2-73.2	69.5-71.2	74.7-75.2	74.3-76.8	71.8-73	70-70.5	85-85.7	70.3-71	73.7-74.2	98.7-98.7
P. veroralis	73.7-74.8	71.8-72.2	71.7-73	75.3-76	72-73.8	83.5-85	83.2-83.5	82-82.5	76.7-78.3	81.2-82	82-83.2	80.7-81.8	76.7-77.5	76.2-77.2	68.3-70	76.2-77.3	73-74.2	98.3-98.3

## Sheet: dnaJ
	Alloprevotella rava	Bacteroides fragilis 638R	Candidatus Prevotella conceptionensis	P. buccae	P. dentalis	P. denticola	P. fusca	P. histicola	P. intermedia	P. melaninogenica cladeA	P. melaninogenica cladeB	P. multiformis	P. nigrescens	P. oris	P. oulorum	P. pallens	P. salivae	P. veroralis
Alloprevotella rava	85.6-99.7
Bacteroides fragilis 638R	56.2-58.7	***-***
Candidatus Prevotella conceptionensis	57.6-58.6	59.9-60.4	97.4-98.3
P. buccae	54.7-57.2	60.4-60.9	69.1-70.3	98.8-100
P. dentalis	51.8-55.9	59-59.2	67.8-69.1	75.1-76.2	98.6-100
P. denticola	55.1-56	57.9-58.8	64.1-65.5	69.6-70.9	68.5-69.7	97.9-100
P. fusca	57.2-59.5	59.2	63.6-64.7	66.2-66.3	65.1-65.6	76-77.1	***-***
P. histicola	58.2-60.9	58.1	63.1-64.1	62.4-63.1	60.3-60.6	69.6-70.1	75.9	100
P. intermedia	57.6-59.2	58.5-60	64.5-66.8	66.2-68.3	63.6-64.9	71-73.5	75.3-76.8	74.5-75.8	94.9-100
P. melaninogenica cladeA	56.8-59.4	59.5-59.6	62.6-64	64.1-64.9	62.7-63.3	75.3-76.5	83.8-84.1	75.9-76	75.3-76.7	97.9-100
P. melaninogenica cladeB	58.6-60.1	60.4-61.5	64.4-65.6	65.9-67.6	63.5-65.5	76-78.2	84.7-85.4	75.6-76.9	73.6-76	85.3-86.8	95.1-98.7
P. multiformis	55.3-55.9	58.1-58.5	64.6-65.4	69.9-71	68.8-69.5	96.7-97.9	75.9-76.2	69.7-69.7	71.3-72.9	75.3-76	75.4-77.2	97.8
P. nigrescens	58.1-59.6	58.8-59.5	64.9-66.5	65.8-67.7	62.6-63.7	70.5-72.1	74.4-75	73.8-74.5	92.8-96.2	75.3-76.9	73.3-76	71-71.8	96.3-100
P. oris	56.3-59.6	61.8-62.1	65.1-66.4	67.7-68.6	65.6-66.5	63.6-64.6	69.7-70	67.6-67.9	66-67.9	69.6-70.5	69.4-70.9	63.6-64.4	66.7-68.1	98.5-99
P. oulorum	55.3-56.7	57.8-58.5	66.4-67.4	70.8-71.3	70-71.5	67.3-68.5	65.4-65.9	63.6-64	63.6-65.4	64.9-65.8	65.3-67.2	67.8-68.6	64.5-65.6	69-69.9	96.8
P. pallens	59.9-61.3	59.1-59.4	63.5-64.7	63.1-63.7	59.7-60.4	69-70.4	76.5-76.9	74.1-74.4	80.3-82.8	76.2-77.1	75.6-77.1	69-69.7	81.4-83.2	67.9-68.7	65.1-65.8	98.6-99.7
P. salivae	56.4-57.6	60.6-60.9	65.3-65.5	65.6-66.9	63.7-64.4	63.3-64.2	67.1-67.4	68.5-68.8	64.9-66.7	68.1-68.5	66.3-68.3	64.4-65	66.3-66.8	79.1-79.6	67.1-67.4	65.9-66	98.2
P. veroralis	58.7-59.4	60-60.1	63.6-64	66.4-67.4	62.4-62.9	73.6-75.1	79.7-79.9	76.8-76.9	75.9-77.2	78.8-79.5	80.8-81.8	74-75	75.8-77.4	69.4-70.1	65.9-66.5	75.5-76.9	68.1-69.1	96.9
